# Supplementary material for: Compost Substrate Formulations Reshape Soil Physicochemical Properties and Rhizosphere Microbiota: A PLS-SEM Analysis
Source: Research Square preprint supplement (doi:10.21203/rs.3.rs-8226073/v1), 2025-12-08
Supplement: Supplementary file 1 [file 3191ba96840ef82ec1758e43.docx]

Supplementary Material

**Supplementary material for material and methods:**
*Periodic Growth Parameter Measurements*

Plant height and stem diameter were measured at 7-day intervals beginning 7 days after sowing, yielding a total of 11 time points. Leaf area was measured at 7-day intervals from day 14 onwards, with a total of 10 time points.

Plant height: Measured from the soil surface to the apex of the main stem using a vertically aligned ruler; values are reported in centimeters (cm).

Stem diameter: Measured using a vernier caliper at 1 cm above the base of the main stem (i.e., above ground level). Values are expressed in millimeters (mm).

Leaf area: Estimated using the equation where A is the area of a single leaf (cm²), L is the maximum leaf length (i.e., length of the primary vein), W is the maximum leaf width, and K is a correction factor (0.71) (Cao & Shi, 1990).

*Final Structural Parameter Measurements*

At the final harvest (77 days after sowing), the following root and shoot morphological traits were assessed:

Branching intensity: Calculated as the ratio of the number of lateral roots to the length of the primary root (Liese et al. 2017).

Root spread ratio: Defined as the ratio of root depth (vertical extension) to root width (horizontal extension).

Root-to-shoot ratio: Calculated as the ratio of root dry weight to aboveground dry weight (stems ＋ leaves).

Stem-height ratio: The ratio of the diameter of the stem (mm) to plant height (cm), used to assess stem robustness relative to vertical growth (Gallegos-Cedillo et al. 2021).

*Seedling Establishment Trait Measurements*

To assess the effect of compost-based substrate treatments on seedling establishment quality, the following traits were evaluated:

Germination index (GI): Calculated according to GB/T 24687.6–2009 (Organic Fertilizers—Part 6: Seed Germination Test):

A1: The percentage of germinated seeds in the culture of organic fertilizer extract to the total number of seeds put in, expressed in percentage (%);

A2: Average root length of all seeds cultured with organic fertilizer extract, in millimeters (mm);

B1: The percentage of germinated seeds in water culture of the total number of seeds put in, expressed in percentage (%);

B2: Average root length of all seeds cultured in water, in millimeters (mm).

Survival rate: The percentage of surviving seedlings after transplantation, calculated relative to the total number of sown seeds.

Seedling vigor index (SVI): Calculated using the formula:

Dry Matter Content Determination: After harvest, roots, stems, and leaves were separated. Samples were immediately heated at 105 °C for 30 minutes to inactivate endogenous enzymes, then dried at 80 °C to constant weight (no change in mass over two consecutive hours). Dried samples were cooled in a desiccator and weighed using an analytical balance (precision: 0.001 g) (Smith 1973).

*Root Vitality Measurement*

Root vitality was assessed using the 2,3,5-triphenyltetrazolium chloride (TTC) reduction assay. After thorough cleaning, primary and lateral root segments were incubated in 0.4% TTC solution at 37 ℃ in a thermostatic water bath (HH8, Shanghai Baoling Instrument Equipment Co., Ltd.) for 30 minutes. The reaction was then terminated, and the resulting dehydrogenation products, triphenylformazan, were extracted with 95% ethanol. Absorbance was measured at 485 nm using a spectrophotometer (SR-721, Shanghai Guangpu Instrument Co., Ltd.). Root vitality was expressed as the optical density (OD) per gram of fresh root tissue, indicating the activity of the root dehydrogenase system.

*Chlorophyll Content Measurement*

Fresh, fully expanded, functional leaves (0.2 g) were cut into small pieces and extracted in the dark with 10 mL of an ethanol–acetone solution (1:1, v/v) for 48 hours until complete decolorization. The absorbance of the extract was measured at 665 nm and 649 nm using a spectrophotometer. Chlorophyll content was expressed on a fresh weight basis. Chlorophyll a, chlorophyll b, and total chlorophyll concentrations were calculated using the following formulas:

Chlorophyll a (mg·g⁻¹ fresh weight, FW) = 13.95 × A₆₆₅ − 6.88 × A₆₄₉

Chlorophyll b (mg·g⁻¹ FW) = 24.96 × A₆₄₉ − 7.32 × A₆₆₅

Total chlorophyll = Chlorophyll a + Chlorophyll b

*Antioxidant Enzyme Activities Measurements*

To evaluate the antioxidant defense capacity of M. sativa under different treatments, the activities of superoxide dismutase (SOD), peroxidase (POD), and catalase (CAT) were determined using commercial assay kits (Solarbio, Beijing, China)， following the manufacturer’s instructions. During sample preparation, extracts were maintained on ice, and enzyme activities were measured immediately. Absorbance was recorded at specific wavelengths using a UV spectrophotometer (SOD: 560 nm; POD: 470 nm; CAT: 240 nm). Enzyme activities were expressed as U·mg⁻¹ protein.

All measurements were conducted in quintuplicate (n = 5 biological replicates), and the arithmetic mean of the replicates was used for subsequent statistical analysis.

*Root Exudate Collection and Sample Preparation*

Root exudates were collected from the rhizosphere of Medicago sativa (alfalfa) plants on day 77 after sowing, under three different treatments: CK (control), FSM, and FS. A total of four biological replicates were collected for each treatment.

To extract root exudates, approximately 200 mg of rhizosphere soil was carefully sampled from the root zone, ensuring that only soil adhering to the root system was collected. The soil was immediately transferred to a 2 mL Eppendorf tube, and 800 µL of a methanol: water solution (4:1, v/v) was added, containing 0.02 mg/mL L-2-chlorophenylalanine as an internal standard. The samples were then homogenized and ground for 6 minutes at 50 Hz using a cryogenic grinder. The homogenate was sonicated at 5°C for 30 minutes (40 kHz) to further break down the samples. After sonication, the samples were incubated at –20°C for 30 minutes and centrifuged at 13,000 × g for 15 minutes at 4°C. The supernatant was filtered through a 0.22 µm organic-phase membrane, transferred to LC vials, and stored at –80°C until further analysis.

*LC-MS/MS Analysis of Root Exudates*

Specified details for sample homogenization and sonication to enhance methodological transparency.

Metabolomic profiling of root exudates was conducted using a Thermo Fisher Scientific UHPLC-Orbitrap Exploris 480 system, equipped with an ACQUITY HSS T3 C18 column (100 mm × 2.1 mm, 1.8 μm). The mobile phase consisted of Solvent A (0.1% formic acid in water/acetonitrile [95:5, v/v]) and Solvent B (0.1% formic acid in acetonitrile/isopropanol/water [47.5:47.5:5, v/v/v]). The flow rate was set at 0.4 mL/min, and the column temperature was maintained at 40°C.

Mass spectrometry was performed in data-dependent acquisition (DDA) mode, alternating between positive and negative electrospray ionization (ESI). The mass-to-charge ratio (m/z) scan range was set to 70–1050. The key MS parameters were as follows:

Spray voltage: +3500 V (positive mode), -3000 V (negative mode)；Sheath gas: 50 arbitrary units (arb)；Auxiliary gas: 13 arb；Ion source temperature: 450°C；Stepped collision energy: 20/40/60 eV

*Data Processing and Statistical Analysis*

The raw mass spectrometry (MS) data were processed using Progenesis QI software (Waters Corporation, USA). Data processing included:

Baseline correction, peak detection, integration, and retention time alignment.

Peak matching was performed to identify metabolites present in the samples.

To monitor system performance, quality control (QC) samples were prepared by pooling equal aliquots from all experimental samples. One QC sample was injected after every 5–10 experimental samples to ensure system stability and data consistency. The median retention time relative standard deviation (RSD) was found to be 4.2% and the peak area RSD was 7.8%, confirming the reliability of the system.

The resulting feature matrix—comprising retention time, m/z ratio, and peak intensity—was used for statistical analysis. The data were then uploaded to the Majorbio Cloud Platform for further metabolomic analysis.

Preprocessing steps included:

Missing value imputation: Retained variables present in ≥80% of the samples in at least one group. Missing values were replaced with the minimum detected value.

Total ion current (TIC) normalization: To reduce inter-sample variability.

QC-based filtering: Variables with RSD >30% in QC samples were excluded.

Log₁₀ transformation: Applied to stabilize variance and improve data normality.

Multivariate statistical analyses were conducted in R (version 4.2.2) using the ropls package (v1.6.2). Principal component analysis (PCA) and orthogonal partial least squares discriminant analysis (OPLS-DA) were used to explore global metabolic differences. Model robustness was assessed by sevenfold cross-validation with a fixed random seed (seed = 123) to ensure reproducibility.

*Metabolite Identification and Pathway Analysis*

Metabolite identification was performed by comparing MS/MS data with reference libraries in the Kyoto Encyclopedia of Genes and Genomes (KEGG) database (Release, 2023). Only metabolites supported by ≥2 diagnostic MS/MS fragment ions and a root mean square (RMS) error <20 ppm were considered confidently annotated. Significant metabolic pathways were identified using Fisher’s exact test (*p* < 0.05) and pathway impact scores >0.1, implemented via the scipy.stats module in Python.

**References**

Cao Yifen, Shi Shangli (1990) A simple method for measuring leaf area in alfalfa[in Chinese]. Pratacultural Sci 7:3

Gallegos-Cedillo VM, Diánez F, Nájera C, Santos M (2021) Plant agronomic features can predict quality and field performance: a bibliometric analysis. Agronomy 11:2305. https://doi.org/10.3390/agronomy11112305

Liese R, Alings K, Meier IC (2017) Root branching is a leading root trait of the plant economics spectrum in temperate trees. Front Plant Sci 8:. https://doi.org/10.3389/fpls.2017.00315

Smith D (1973) Influence of drying and storage conditions on nonstructural carbohydrate analysis of herbage tissue—a review. Grass Forage Sci 28:129–134. https://doi.org/10.1111/j.1365-2494.1973.tb00733.x
